# Supplementary material for: Cyclin-dependent kinase inhibitor 1 plays a more prominent role than activating transcription factor 4 or the p53 tumour suppressor in thapsigargin-induced G1 arrest
Source: PeerJ. 2023 Dec 18;11:e16683. doi: 10.7717/peerj.16683 (PMC10734451; doi:10.7717/peerj.16683)
Supplement: Supplemental Information 6 — The raw data used to generate all graphs in Figures 1 through 5. [file peerj-11-16683-s006.xlsx]

## Sheet: HCT116 ATCC
Cell cycle analysis of HCT116 cells (source ATCC) treated with the indicated concentration of Tg for 24 hours. Values represent the % of cells in the indicated phase of the cell cycle as determined from 2 parameter flow cytometry (replication versus DNA content)
G1 phase	Tg (µM)	expt 1	expt 2	expt 3	expt 4	expt 5	expt 6	expt 7		mean	SEM	n
	0	48.2013	51.0928	53.9817	46.4622	40.0497	38.8615	33.1668		44.5451	2.80706	7
	0.1	81.3324	69.5084	76.9143	69.5462	69.2878	74.6431	67.9183		72.7358	1.89414	7
	0.2	83.9801	67.5894	70.1979	64.9223	73.1235	71.2907	55.1451		69.4642	3.2992	7
	0.5	83.1537	67.6215	69.4924	61.2435	66.3314	71.0001	64.9285		69.1102	2.62881	7
	1	87.1733	61.1731	70.4902	63.4126	65.3642	71.9769	51.3351		67.2751	4.1926	7
	2	75.2408	64.705	67.4156	63.1002	65.9233	72.9996	65.8236		67.8869	1.70148	7
S phase	0	34.6788	35.426	33.0895	36.3083	47.696	48.8025	51.5573		41.0798	2.97907	7
	0.1	3.37117	6.6893	5.40448	4.80552	4.02238	3.25963	7.9792		5.07596	0.664187	7
	0.2	3.62139	4.80795	5.63562	9.30589	3.73454	4.66165	6.26967		5.43382	0.738285	7
	0.5	8.62318	7.02046	5.43826	5.76488	6.34018	4.06337	9.54788		6.68546	0.714776	7
	1	3.84362	5.12596	5.64142	4.99367	2.77745	3.7048	8.5759		4.95183	0.709671	7
	2	2.64041	5.66038	5.80343	4.956	2.0669	2.04604	9.131		4.61488	0.975987	7
G2 phase	0	17.1199	13.4813	12.9288	17.2296	12.2544	12.336	15.2759		14.3751	0.817073	7
	0.1	15.2964	23.8023	17.6812	25.6483	26.6898	22.0973	24.1025		22.1883	1.59108	7
	0.2	12.3985	27.6027	24.1665	25.7718	23.1419	24.0476	38.5853		25.102	2.9102	7
	0.5	8.22314	25.3581	25.0693	32.9916	27.3284	24.9365	25.5236		24.2044	2.87324	7
	1	8.98309	33.701	23.8684	31.5938	31.8583	24.3183	40.089		27.7731	3.77446	7
	2	22.1188	29.6346	26.781	31.9438	32.0098	24.9543	25.0454		27.4982	1.43611	7
SubG1 analysis of HCT116 cells treated with the indicated concentration of Tg for 48 hours. Values represent the % of cells with less than 2C DNA content as determined with one parameter flow cytometric analysis of DNA content.
subG1	Tg (µM)	expt 1	expt 2	expt 3	expt 4	expt 5	expt 6	expt 7	expt 8	expt 9		mean	SEM	n
	0	5.23	3.5	3.14	2.9	2.7	2.2	2.8	1.5	4.9		3.20778	0.399548	9
	0.1	12.21	11.61	6.6				2.4	8.9	4.3		7.67	1.61165	6
	0.2	14.94	11.12	7.64				8.8	6.7	4.3		8.91667	1.51664	6
	0.5	12.05	13.91	10.92	4.3	8.4	2.8	10.2	6.6	7.4		8.50889	1.21092	9
	1	10.34	10.27	10.16	3.4	2.8	2.4	6.6	16.9	15		8.65222	1.75276	9
	2	15.02	11.08	12.9	5.6	2.3	2.6	1.3	36.3	4.8		10.2111	3.65568	9

## Sheet: HCT116 ATF4-def
Cell cycle analysis of HCT116 ATF4-def cells treated with the indicated concentration of Tg for 24 hours. Values represent the % of cells in the indicated phase of the cell cycle as determined from 2 parameter flow cytometry (replication versus DNA content)
G1 phase	Tg (µM)	expt 1	expt 2	expt 3		mean	SEM	n
	0	49.3014	39.9884	32.9603		40.75	4.73263	3
	0.1	60.8543	67.6636	58.3905		62.3028	2.77316	3
	0.2	59.2503	66.884	57.4323		61.1889	2.89552	3
	0.5	59.3058	54.3825	57.4054		57.0312	1.43349	3
	1	60.4741	60.7268	50.9655		57.3888	3.21248	3
	2	61.8346	60.9851	55.7889		59.5362	1.88962	3
S phase	0	32.3137	49.3147	52.3535		44.6606	6.23548	3
	0.1	16.4489	13.9157	20.8047		17.0564	2.01177	3
	0.2	16.484	18.8943	20.8908		18.7564	1.27401	3
	0.5	16.5399	24.9965	19.973		20.5031	2.45554	3
	1	12.7212	20.972	19.6179		17.7704	2.55465	3
	2	14.9417	22.3266	17.3871		18.2185	2.172	3
G2 phase	0	18.3848	10.6969	14.6862		14.5893	2.21986	3
	0.1	22.6968	18.4207	20.8047		20.6408	1.23713	3
	0.2	24.2657	14.2217	21.6769		20.0547	3.01075	3
	0.5	24.1543	20.621	22.6216		22.4656	1.02294	3
	1	26.8047	18.3012	29.4166		24.8408	3.35561	3
	2	23.2237	16.6883	26.8239		22.2453	2.96654	3
SubG1 analysis of HCT116 ATF4-def cells treated with the indicated concentration of Tg for 48 hours. Values represent the % of cells with less than 2C DNA content as determined with one parameter flow cytometric analysis of DNA content.
subG1	Tg (µM)	expt 1	expt 2	expt 3	expt 4	expt 5	expt 6	expt 7	expt 8	expt 9		mean	SEM	n
	0	6.22	3.97	4.41	4.7	2.3	2.5	1	1.5	0.7		3.03333	0.628682	9
	0.1	22.76	23.34	13.39				3.8	24.9	10		16.365	3.51016	6
	0.2	25.11	25.36	14.25				10.7	35	6.5		19.4867	4.39721	6
	0.5	25.24	23.84	19.36	14.2	16.6	19.9	10.2	78.6	8.3		24.0267	7.07969	9
	1	31	27.3	19.28	21.5	14.7	20.1	15.7	64	10		24.8422	5.33415	9
	2	28.07	27.04	19.07	22.8	12.9	19	13.7	69	16		25.2867	5.74934	9

## Sheet: HCT116 Vogelstein lab
Cell cycle analysis of HCT116 cells (source Vogelstein lab) treated with the indicated concentration of Tg for 24 hours. Values represent the % of cells in the indicated phase of the cell cycle as determined from 2 parameter flow cytometry (replication versus DNA content)
G1 phase	Tg (µM)	expt 1	expt 2	expt 3	expt 4	expt 5	expt 6	expt 7		mean	SEM	n
	0	48.2013	51.0928	53.9817	46.4622	40.0497	38.8615	33.1668		44.5451	2.80706	7
	0.1	81.3324	69.5084	76.9143	69.5462	69.2878	74.6431	67.9183		72.7358	1.89414	7
	0.2	83.9801	67.5894	70.1979	64.9223	73.1235	71.2907	55.1451		69.4642	3.2992	7
	0.5	83.1537	67.6215	69.4924	61.2435	66.3314	71.0001	64.9285		69.1102	2.62881	7
	1	87.1733	61.1731	70.4902	63.4126	65.3642	71.9769	51.3351		67.2751	4.1926	7
	2	75.2408	64.705	67.4156	63.1002	65.9233	72.9996	65.8236		67.8869	1.70148	7
S phase	0	34.6788	35.426	33.0895	36.3083	47.696	48.8025	51.5573		41.0798	2.97907	7
	0.1	3.37117	6.6893	5.40448	4.80552	4.02238	3.25963	7.9792		5.07596	0.664187	7
	0.2	3.62139	4.80795	5.63562	9.30589	3.73454	4.66165	6.26967		5.43382	0.738285	7
	0.5	8.62318	7.02046	5.43826	5.76488	6.34018	4.06337	9.54788		6.68546	0.714776	7
	1	3.84362	5.12596	5.64142	4.99367	2.77745	3.7048	8.5759		4.95183	0.709671	7
	2	2.64041	5.66038	5.80343	4.956	2.0669	2.04604	9.131		4.61488	0.975987	7
G2 phase	0	17.1199	13.4813	12.9288	17.2296	12.2544	12.336	15.2759		14.3751	0.817073	7
	0.1	15.2964	23.8023	17.6812	25.6483	26.6898	22.0973	24.1025		22.1883	1.59108	7
	0.2	12.3985	27.6027	24.1665	25.7718	23.1419	24.0476	38.5853		25.102	2.9102	7
	0.5	8.22314	25.3581	25.0693	32.9916	27.3284	24.9365	25.5236		24.2044	2.87324	7
	1	8.98309	33.701	23.8684	31.5938	31.8583	24.3183	40.089		27.7731	3.77446	7
	2	22.1188	29.6346	26.781	31.9438	32.0098	24.9543	25.0454		27.4982	1.43611	7
SubG1 analysis of HCT116 cells treated with the indicated concentration of Tg for 48 hours. Values represent the % of cells with less than 2C DNA content as determined with one parameter flow cytometric analysis of DNA content.
subG1		expt 1	expt 2	expt 3	expt 4	expt 5	expt 6	expt 7	expt 8	expt 9		mean	SEM	n
	0	4.47	3.52	4.13	5.7	3.1	12.96	5.16	3.82	7.17		5.55889	1.01383	9
	0.1	8.63	7.2	14	16.78	9.98	19.42	26.19	21.01	19.01		15.8022	2.11459	9
	0.2	9.93	11.69	25.36	15.17	7.7	20.9	26.39	21.65	19.3		17.5656	2.25255	9
	0.5	11.13	8.26	15.66	6.09	9.89	19.82	21.52	18.9	21.18		14.7167	1.98873	9
	1	14.86	10.99	25.08	5.75	8.41	29.16	24.7	18.99	27.11		18.3389	2.89523	9
	2	13.59	10.89	31.33	6.5	10.21	28.07	29.33	16.6	29.45		19.5522	3.29515	9

## Sheet: HCT116 p53 null
Cell cycle analysis of HCT116 p53 null cells treated with the indicated concentration of Tg for 24 hours. Values represent the % of cells in the indicated phase of the cell cycle as determined from 2 parameter flow cytometry (replication versus DNA content)
G1 phase	Tg (µM)	expt 1	expt 2	expt 3	expt 4		mean	SEM	n
	0	38.1288	45.7081	42.6312	32.8916		39.8399	2.79036	4
	0.1	58.9474	70.4071	62.8113	57.1178		62.3209	2.94504	4
	0.2	64.281	63.6774	63.1489	56.3548		61.8656	1.85141	4
	0.5	61.1024	67.6913	68.2813	56.7268		63.4504	2.76952	4
	1	79.1318	64.3837	63.5574	52.8606		64.9834	5.39701	4
	2	65.4506	59.3366	62.7272	59.7811		61.8239	1.42386	4
S phase	0	45.0747	39.2931	43.6358	51.8315		44.9588	2.59964	4
	0.1	12.7144	8.65465	15.1476	18.6832		13.8	2.10783	4
	0.2	0.919238	10.9529	11.3313	18.1886		10.348	3.55562	4
	0.5	11.9796	8.35092	9.63703	16.168		11.5339	1.71763	4
	1	18.9331	5.59085	9.3279	18.4206		13.0681	3.32848	4
	2	8.11427	11.2991	9.95112	12.3939		10.4396	0.922128	4
G2 phase	0	16.7965	14.9988	13.733	15.2769		15.2013	0.628958	4
	0.1	28.3383	20.9383	22.0411	24.1989		23.8791	1.63333	4
	0.2	34.7997	25.3697	25.5198	25.4566		27.7864	2.33797	4
	0.5	26.918	23.9578	22.0817	27.1052		25.0157	1.21492	4
	1	1.93515	30.0254	27.1147	28.7188		21.9485	6.69762	4
	2	26.4351	29.3644	27.3217	27.8249		27.7365	0.613964	4
SubG1 analysis of HCT116 p53 null cells treated with the indicated concentration of Tg for 48 hours. Values represent the % of cells with less than 2C DNA content as determined with one parameter flow cytometric analysis of DNA content.
SubG1 analysis of HCT116 p53 null cells treated with the indicated concentration of Tg for 48 hours. Values represent the % of cells with less than 2C DNA content as determined with one parameter flow cytometric analysis of DNA content.	Tg (µM)	expt 1	expt 2	expt 3	expt 4		mean	SEM	n
	0	15.16	11.77	6.01	12.18		11.28	1.91218	4
	0.1	55.74	54.01	24.53			44.76	10.1273	3
	0.2	37.43	56.23	28.93	38.39		40.245	5.73669	4
	0.5	50.91	46.01	21.56			39.4933	9.07755	3
	1	39.78	42.3	21.12	40.58		35.945	4.96955	4
	2	41.75	36.9	24.6	38.75		35.5	3.76823	4

## Sheet: HCT116 p21 null
Cell cycle analysis of HCT116 p21 null cells treated with the indicated concentration of Tg for 24 hours. Values represent the % of cells in the indicated phase of the cell cycle as determined from 2 parameter flow cytometry (replication versus DNA content)
G1 phase	Tg (µM)	expt 1	expt 2	expt 3		mean	SEM	n
	0	31.3814	28.851	30.2747		30.169	0.732366	3
	0.1	43.8395	43.2318	35.1617		40.7443	2.79683	3
	0.2	47.7986	42.8646	44.6668		45.11	1.44145	3
	0.5	46.6058	47.1099	41.4664		45.0607	1.80305	3
	1	50.316	47.0113	47.5378		48.2884	1.02516	3
	2	46.8165	50.9451	33.5913		43.7843	5.23401	3
S phase	0	54.1855	49.9885	52.2141		52.1293	1.21231	3
	0.1	40.831	34.6093	45.4334		40.2912	3.13628	3
	0.2	37.2455	34.6259	35.622		35.8311	0.763389	3
	0.5	36.3983	35.4433	41.2246		37.6887	1.78932	3
	1	34.9547	34.544	36.5066		35.3351	0.597624	3
	2	35.7505	31.3993	36.0705		34.4068	1.50657	3
G2 phase	0	14.4331	21.1605	17.5113		17.7016	1.94436	3
	0.1	15.3295	22.1589	19.4049		18.9645	1.98375	3
	0.2	14.956	22.5095	19.7112		19.0589	2.20476	3
	0.5	16.9959	17.4468	17.309		17.2505	0.133419	3
	1	14.7293	18.4447	15.9556		16.3766	1.093	3
	2	17.4329	17.6556	30.3382		21.8089	4.26514	3
SubG1 analysis of HCT116 p21 null cells treated with the indicated concentration of Tg for 48 hours. Values represent the % of cells with less than 2C DNA content as determined with one parameter flow cytometric analysis of DNA content.
subG1	Tg (µM)	expt 1	expt 2	expt 3	expt 4	expt 5		mean	SEM	n
	0	5.65	8.04	20.93	7.91	10.54		10.614	2.69262	5
	0.1	18.62	24.21	33.1	21.32	27.32		24.914	2.50825	5
	0.2	20.17	27.05	37.84	12.12	30.28		25.492	4.38725	5
	0.5	28.38	29.01	19.72	20.5	32.24		25.97	2.4834	5
	1	32.22	30.47	38.64	24.34	31.52		31.438	2.27822	5
	2	25.92	34.31	40.76	23.85	31.37		31.242	3.02479	5

## Sheet: NFhTERT
Cell cycle analysis of NFhTERT cells treated with the indicated concentration of Tg for 24 hours. Values represent the % of cells in the indicated phase of the cell cycle as determined from 2 parameter flow cytometry (replication versus DNA content)
G1 phase	Tg (µM)	expt 1	expt 2	expt 3		mean	SEM	n
	0	58.9339	62.4685	52.6023		58.0016	2.88603	3
	0.1	88.2802	92.2075	80.2899		86.9259	3.50632	3
	0.2	88.6757	91.8427	75.5535		85.3573	4.98643	3
	0.5	86.9944	92.6941	77.9073		85.8653	4.30576	3
	1	84.7685	83.4245	83.6648		83.9526	0.413806	3
	2	85.8096	89.7999	84.2343		86.6146	1.6563	3
S phase	0	23.98	21.2687	28.1834		24.4774	2.01154	3
	0.1	4.44683	4.98	4.87673		4.76785	0.163258	3
	0.2	4.73635	4.35945	4.30944		4.46841	0.134743	3
	0.5	5.72548	4.26285	4.76124		4.91652	0.429303	3
	1	8.27526	12.1367	3.35161		7.92119	2.54221	3
	2	7.95634	7.30139	8.46342		7.90705	0.336353	3
G2 phase	0	17.0861	16.2627	19.2142		17.521	0.879337	3
	0.1	7.27297	2.81254	14.8334		8.3063	3.50837	3
	0.2	6.58795	3.79781	20.1371		10.1743	5.04609	3
	0.5	7.28008	3.04302	17.3315		9.21819	4.23702	3
	1	6.9562	4.43877	12.9836		8.12617	2.53509	3
	2	6.23408	2.89873	7.30228		5.47836	1.32617	3
SubG1 analysis of NFhTERT cells treated with the indicated concentration of Tg for 48 hours. Values represent the % of cells with less than 2C DNA content as determined with one parameter flow cytometric analysis of DNA content.
subG1	Tg (µM)	expt 1	expt 2	expt 3		mean	SEM	n
	0	2.25	3.68	5		3.64333	0.794068	3
	0.1	6.02	14.67	24.2		14.9633	5.25016	3
	0.2	6.03	10.5	23.13		13.22	5.12026	3
	0.5		8.3	16.87		12.585	4.285	2
	1	5.63	11.5	16.6		11.2433	3.16937	3
	2	6.82	12.97	21.18		13.6567	4.15957	3

## Sheet: ZVAD-fmk experiments
SubG1 analysis of NFhTert, HCT116 and p21-null cells treated with DMSO, 2 µM Tg, 25 µM ZVAD-fmk or both for 48 hours. Values represent the % of cells with less than 2C DNA content as determined with one parameter flow cytometric analysis of DNA content.
NFhTert
Sample	expt 1	expt 2	expt 3	expt 4		mean	SEM	n
DMSO	3.87	2.91	4.21	5.43		4.105	0.520408	4
ZVAD	10.13	2.41	3.91	3.55		5	1.73963	4
Tg2	13.86	8.09	20.05	20.84		15.71	2.98104	4
ZVAD+Tg2	3.37	4.47	4.25	8.3		5.0975	1.09363	4
HCT116
Sample	expt 1	expt 2	expt 3			mean	SEM	n
DMSO	2.3	3.6	1.2			2.36667	0.693622	3
ZVAD	1.8	1.1	0.6			1.16667	0.34801	3
Tg2	19.3	16.7	6.7			14.2333	3.84072	3
ZVAD+Tg2	2	2.1	1.8			1.96667	0.0881917	3
p21-null
Sample	expt 1	expt 2	expt 3	expt 4		mean	SEM	n
DMSO	6.3	2.7	3.7	2		3.675	0.941962	4
ZVAD	3.1	3.2	1.8	6.4		3.625	0.978413	4
Tg2	66.9	53.1	53.8	30.3		51.025	7.60234	4
ZVAD+Tg2	28.2	7.8	7.1	11		5.0975	1.09363	4
